# Supplementary material for: Predicting wastewater effects on antibiotic fluorescence from laboratory DOM quenching behavior by fingerprinting and machine learning
Source: Royal Society of Chemistry journal article supplement (doi:10.1039/d6ra01194b), 2026-04-22
Supplement: d6ra01194b1.pdf [file d6ra01194b1.pdf]

## Supplementary materials for

### Predicting Wastewater Effects on Antibiotic Fluorescence from Laboratory DOM Quenching Behavior by Fingerprinting and Machine Learning

Hmuu Khet Nwe Zaw<sup>1</sup>, Yuchao Wu<sup>2</sup>, Yawei Xie<sup>1\*</sup>

<sup>1</sup> College of Civil Engineering, Zhejiang University of Technology, 310023, Hangzhou, China

<sup>2</sup> Jiaying Hehe Environmental Protection Technology Company, 314409, Jiaying, China

\*Corresponding author: Yawei Xie (xyw@zjut.edu.cn)

#### Text S1. Machine Learning Analysis

19-feature matrix was constructed for each antibiotic (n=27), including: (1) intensity features (raw and log-transformed fluorescence at pH 5, 7, 9; maximum intensity; pH sensitivity ratio  $\text{IntpH9}/\text{IntpH5}$ ), (2) PARAFAC component scores (C1-C3 at each pH), and (3) spectral complexity (number of emission peaks). Features were z-score standardized before analysis.<sup>1</sup>

Random Forest classifiers (TreeBagger, MATLAB R2023b) were trained using 100 decision trees with bootstrap aggregation, following.<sup>2,3</sup> Leave-one-out cross-validation (LOOCV) was employed given the sample size, where each antibiotic was iteratively held out for prediction while the remaining 26 were used for training.<sup>4</sup> Two classification tasks were performed: (1) pH Response (Enhanced/Quenched/Stable based on pH ratio  $>2$  and  $<0.5$ ), and (2) Detection Feasibility (Easy/Conditional/Difficult based on peak count and maximum intensity thresholds).

Permutation-based feature importance was calculated from out-of-bag error increases.<sup>4</sup> The Detection Risk Index (DRI) was developed as a weighted composite score that integrates three fluorescence-derived parameters: maximum intensity ( $w = 0.5$ ), spectral window coverage ( $w = 0.3$ ), and number of detectable peaks ( $w = 0.2$ ). This weighting scheme emphasizes the primary influence of signal intensity on EEM-based detectability, while also accounting for the additional roles of spectral complexity and peak multiplicity. DRI values, which range from 0 to 1, were subsequently used to classify all 27 antibiotics into three risk categories: Low Risk ( $\text{DRI} \geq 0.557$ ), Medium Risk ( $\text{DRI} 0.396\text{-}0.557$ ), and High Risk ( $\text{DRI} < 0.396$ ). Model performance was evaluated using accuracy, precision, recall, and F1-score derived from confusion matrices.<sup>5,6</sup>

Table S1. Lists of 27 kinds of antibiotics

| NO | Antibiotic        | No | Antibiotic      |
|----|-------------------|----|-----------------|
| 1  | Tetracycline      | 15 | Azithromycin    |
| 2  | Doxycycline       | 16 | Tylosin         |
| 3  | Chlortetracycline | 17 | Gentamicin      |
| 4  | Norfloxacin       | 18 | Neomycin        |
| 5  | Ciprofloxacin     | 19 | Metronidazole   |
| 6  | Levofloxacin      | 20 | Ornidazole      |
| 7  | Enrofloxacin      | 21 | Chloramphenicol |
| 8  | Amoxicillin       | 22 | Florfenicol     |
| 9  | Ampicillin        | 23 | Vancomycin      |
| 10 | Cephalexin        | 24 | Polymyxin B     |
| 11 | Sulfadiazine      | 25 | Clindamycin     |
| 12 | Sulfadimethoxine  | 26 | Trimethoprim    |
| 13 | Sulfanilamide     | 27 | Rifampicin      |
| 14 | Erythromycin      |    |                 |

Table S2. PARAFAC component scores for all 27 antibiotics at pH 5, 7, and 9.

| Antibiotic        | pH5    |         |         | pH7     |        |        | pH9    |        |        |
|-------------------|--------|---------|---------|---------|--------|--------|--------|--------|--------|
|                   | C1     | C2      | C3      | C1      | C2     | C3     | C1     | C2     | C3     |
| Tetracycline      | 0.1674 | 0.29191 | 0.41013 | 1.66384 | 1.0551 | 3.5713 | 4.1303 | 0      | 9.3510 |
|                   | 9      |         |         |         | 9      | 8      | 8      |        | 9      |
| Doxycycline       | 0.1486 | 0.18760 | 0.07924 | 0       | 14.521 | 0      | 24.574 | 6.5946 | 10.853 |
|                   | 8      |         |         |         | 0      |        | 9      | 7      | 7      |
| Chlortetracycline | 4.3304 | 0       | 0.13125 | 273.107 | 41.170 | 0      | 1063.5 | 81.161 | 0      |
|                   | 8      |         |         |         | 9      |        | 4      |        |        |
| Norfloxacin       | 351.73 | 9.22386 | 0       | 2769.35 | 0      | 0      | 0      | 197.79 | 0      |
|                   | 1      |         |         |         |        |        |        | 4      |        |
| Ciprofloxacin     | 394.56 | 0       | 0       | 4660.22 | 512.31 | 0      | 32.391 | 874.27 | 11.958 |
|                   | 0      |         |         |         | 7      |        | 1      | 6      | 0      |
| Enrofloxacin      | 495.14 | 45.9987 | 0.91021 | 3526.52 | 339.25 | 0      | 0      | 6.0775 | 575.61 |
|                   | 7      |         |         |         | 7      |        |        | 4      |        |
| Levofloxacin      | 0      | 482.444 | 0       | 109.904 | 6134.2 | 0      | 6.1041 | 1.1691 | 586.81 |
|                   |        |         |         |         | 1      |        | 2      | 2      | 8      |
| Amoxicillin       | 0      | 0.00019 | 0.10067 | 0       | 0.4311 | 2.5944 | 0.8396 | 0.0077 | 0.5005 |
|                   |        |         |         |         | 0      | 1      | 8      | 7      | 6      |
| Ampicillin        | 0.0002 | 0       | 0.00007 | 1.00893 | 0.9423 | 1.8633 | 0.7934 | 0.9937 | 0      |
|                   |        |         |         |         | 9      | 0      | 7      | 02     |        |
| Cephalexin        | 0.4300 | 0       | 0.00938 | 9.47679 | 37.162 | 0.1607 | 12.337 | 0      | 2.6618 |
|                   | 7      |         |         |         | 0      | 9      | 8      |        | 5      |
| Sulfadimethoxine  | 0.1596 | 0.14831 | 0.23705 | 1.94376 | 0.2134 | 1.1779 | 0.4861 | 0.3698 | 0.5969 |
|                   | 2      |         |         |         | 9      | 4      | 1      | 2      | 0      |
| Sulfadiazine      | 0.2011 | 2.22386 | 0.13413 | 0.22602 | 0      | 1.3456 | 0.4162 | 0.4629 | 0.1612 |
|                   | 7      |         |         |         |        | 8      | 2      | 8      | 0      |
| Sulfanilamide     | 3.3769 | 0       | 146.623 | 8.03046 | 0      | 2248.6 | 0      | 10.464 | 0      |
|                   | 6      |         |         |         |        | 1      |        | 0      |        |
| Erythromycin      | 0      | 0.02049 | 0.03465 | 0.02545 | 0.0032 | 0.0627 | 0.1197 | 0.0006 | 0.0197 |

|                 |        |          |         |         |        |        |        |        |        |
|-----------------|--------|----------|---------|---------|--------|--------|--------|--------|--------|
|                 |        |          |         |         | 7      | 3      | 1      | 7      | 7      |
| Azithromycin    | 1.9854 | 0        | 0.02889 | 0       | 0.0071 | 0.2903 | 0.7264 | 0.1222 | 0.0910 |
|                 | 0      |          |         |         | 2      | 9      | 1      | 8      | 3      |
| Tylosin         | 0.4232 | 0        | 0.17988 | 0.01377 | 0.0167 | 0.0066 | 0.4146 | 0.4874 | 0.1959 |
|                 | 5      |          |         |         | 7      | 0      | 4      | 7      | 1      |
| Gentamicin      | 0      | 0.00002  | 0.00111 | 0.03799 | 0      | 0.0338 | 0.1398 | 0.2084 | 0.0692 |
|                 |        |          |         |         |        | 14     | 01     | 73     | 94     |
| Neomycin        | 0      | 0.000020 | 0.01119 | 0.00500 | 0      | 0.0019 | 0.4527 | 0.2119 | 0.0067 |
|                 |        | 3        |         |         |        | 2      | 4      | 8      | 0      |
| Metronidazole   | 0.0006 | 0.000096 | 0.00019 | 0.07659 | 0.1013 | 0.1182 | 1.1474 | 0      | 0      |
|                 | 7      | 7        |         |         | 7      | 8      | 4      |        |        |
| Ornidazole      | 0.0008 | 0        | 0.00014 | 0.01569 | 0      | 0.0026 | 0.3096 | 0.4339 | 0.0410 |
|                 | 8      |          |         |         |        | 4      | 0      | 1      | 6      |
| Chloramphenicol | 0      | 0.000004 | 0.00006 | 0.00767 | 0.0018 | 0.0083 | 0.0700 | 0.1267 | 0.0286 |
|                 |        | 14       | 56      |         | 4      | 7      | 1      | 5      | 1      |
| Florfenicol     | 0      | 0.000036 | 0.03301 | 0       | 0.0596 | 1.0133 | 0.1021 | 0.1511 | 0.0716 |
|                 |        | 8        | 8       |         | 7      | 5      | 7      | 0      | 0      |
| Vancomycin      | 0.0071 | 0        | 0.25538 | 0       | 0.0736 | 1.5127 | 0      | 0.4407 | 0.1775 |
|                 | 2      |          | 5       |         | 6      |        |        | 4      | 1      |
| PolymyxinB      | 0      | 0.000019 | 0.00106 | 0.00040 | 0.0234 | 0.2028 | 0.1445 | 0.1521 | 0.0611 |
|                 |        | 4        |         |         | 6      | 7      | 4      | 7      | 7      |
| Clindamycin     | 0      | 0.0003   | 0.05517 | 0       | 0.0028 | 0.7345 | 0.3208 | 0.0349 | 0.0221 |
|                 |        |          |         |         | 1      | 1      | 4      | 4      | 5      |
| Trimethoprim    | 0.3422 | 0        | 0.13820 | 0       | 4.9011 | 3.4242 | 0      | 0.8186 | 0.5919 |
|                 | 99     |          |         |         | 2      | 2      |        | 3      | 4      |
| Rifampicin      | 0      | 0.000014 | 0.00021 | 0.01130 | 0.1445 | 0.0068 | 0.0642 | 0      | 0.6963 |
|                 |        | 8        |         |         | 6      | 2      | 5      |        | 7      |

Table S3. pH Quenching effects of antibiotic-DOM mixture in pure-water

| pH | Intensity of Mixture without HA | Mixture intensity with HA (5mg/L) | Quenching (%) |
|----|---------------------------------|-----------------------------------|---------------|
| 5  | 22,355 ± 559                    | 13,779 ± 247                      | +38.4 ± 2.8   |
| 7  | 15,662 ± 156                    | 14,849 ± 74                       | +5.2 ± 2.5    |
| 9  | 16,458 ± 326                    | 15,243 ± 457                      | +7.4 ± 4.3    |

Table S4. Comparison of antibiotic-DOM quenching parameters with published literature values.

| Antibiotic          | Parameter       | This study               | Literature value             | Reference    | Key difference                                                                                                                                                      |
|---------------------|-----------------|--------------------------|------------------------------|--------------|---------------------------------------------------------------------------------------------------------------------------------------------------------------------|
| Ciprofloxacin (CIP) |                 |                          |                              |              |                                                                                                                                                                     |
|                     | $K_{sv}$ (L/mg) | -0.0446<br>(enhancement) | $K_b < 1$ (static quenching) | <sup>7</sup> | Literature measures HA fluorescence quenched by CIP at pH 6-7.4, ionic strength, while this study measured CIP fluorescence with HA addition in pure water at pH 7. |
|                     | $R^2$           | 0.3469                   | Linear S-V plot reported     | <sup>7</sup> | No significant S-V relationship in present study                                                                                                                    |

|                                |                                |                                                                            |    |                                                                                                                                                                                                                                  |
|--------------------------------|--------------------------------|----------------------------------------------------------------------------|----|----------------------------------------------------------------------------------------------------------------------------------------------------------------------------------------------------------------------------------|
| Mechanism                      | No significant interaction     | Static quenching; $\Delta H = -9.5$ to $-27.6$ kJ/mol                      | 7  | Literature measures antibiotics to HA while this study HA to antibiotic                                                                                                                                                          |
| Binding Site                   | -                              | Aromatic ring adjacent to two N - group                                    | 8  | Consistent with identification of CIP binding domain                                                                                                                                                                             |
| Ex/Em (nm)                     | 270-345/395-455                | 275/445 (zwitterionic, pH 7.4)                                             | 9  | Consistent spectral positions                                                                                                                                                                                                    |
| <b>Chlortetracycline (CTC)</b> |                                |                                                                            |    |                                                                                                                                                                                                                                  |
| $K_{sv}$ (L/mg)                | 0.1212                         | OTC: $K_{sv} = 3.22-12.78 \times 10^3$ L/mol (HA quenched by OTC)          | 10 | The researcher used structural analog OTC; measured HA fluorescence quenched by antibiotic nearly constant pH 4-6, maximum around 6-8, decreases near pH 10. This study focuses only pH 7, so consistent with mid-range binding. |
| $R^2$                          | 0.0148                         | $R^2 > 0.95$ (OTC-HA system)                                               | 10 | Poor linearity in present study suggests mixed mechanisms                                                                                                                                                                        |
| Quenching % (pH 7)             | $-5.1 \pm 1.2\%$ (enhancement) | OTC: 0-41.8% quenching of DOM                                              | 11 | Literature found HA quenching by OTC, while this study measured CTC slight quenching by HA                                                                                                                                       |
| Binding stoichiometry          | -                              | 1:1 (OTC:HA)                                                               | 10 | Saturation plateau at 5-10 mg/L HA supports binding site model                                                                                                                                                                   |
| Mechanism                      | Non-significant, mixed         | Static quenching: H-bond + van der Waals                                   | 10 | CTC-HA may involve both static and dynamic pathways                                                                                                                                                                              |
| <b>Sulfanilamide (SAN)</b>     |                                |                                                                            |    |                                                                                                                                                                                                                                  |
| $K_{sv}$ (L/mg)                | 0.2003                         | $K_{sv}$ (SD) < $K_{sv}(\text{OTC})$ ; $K_b = 2.05-5.53 \times 10^3$ L/mol | 11 | different systems and pH/ionic strength                                                                                                                                                                                          |
| $R^2$                          | 0.0856                         | Linear S-V (SD-HA)                                                         | 10 | Good linearity in both studies supports dynamic quenching                                                                                                                                                                        |

|                         |                                         |                                                         |    |                                                                                                                                                                                                                                                  |
|-------------------------|-----------------------------------------|---------------------------------------------------------|----|--------------------------------------------------------------------------------------------------------------------------------------------------------------------------------------------------------------------------------------------------|
| Quenching %             | 12.6 ± 1.3 quenching                    | SD: 0-32% quenching of DOM components                   | 11 | Variable pH response consistent with literature                                                                                                                                                                                                  |
| Mechanism               | Dynamic quenching (significant)         | Static quenching (SD-HA)                                | 10 | Sulfadiazine (SD), a structurally related sulfonamide, SAN mostly neutral while SDZ partly deprotonated. This supports stronger hydrogen bonding for neutral SAN and more static complexation for SDZ.                                           |
| <b>Cephalexin (CEP)</b> |                                         |                                                         |    |                                                                                                                                                                                                                                                  |
| $K_{sv}$ (L/mg)         | -0.0678 (enhancement)                   | $\log K_c = 5.33-8.48$ (pH-dependent, Ryan-Weber model) | 12 | The present study found CEP fluorescence enhanced by HA at pure water pH 7, no background salts. The recent study reported synthetic wastewater, various ionic strengths; found binding insensitive to $Na^+/Ca^{2+}$ but strongly pH-dependent. |
| $R^2$                   | 0.7117                                  | $R^2 > 0.90$ (Ryan-Weber fits)                          | 12 | Good fit in both studies                                                                                                                                                                                                                         |
| Mechanism               | Fluorescence enhancement                | $\pi-\pi$ interactions; pH-dependent binding            | 12 | Both studies identify $\pi-\pi$ bonding as key interaction                                                                                                                                                                                       |
| pH dependence           | Enhancement increases from pH 5 to pH 9 | $\log K_c$ decreases from 8.48 (pH 4) to 5.33 (pH 7)    | 12 | Consistent with CEP-DOM interaction is pH-dependent                                                                                                                                                                                              |

**Notes:**

This study measures antibiotic fluorescence in the presence of increasing HA concentrations (0-10 mg/L) at pH 7.

Literature values often measured HA/DOM fluorescence quenched by antibiotic addition (reverse direction).

$K_{sv}$  values are not directly comparable across studies due to differences in measurement direction, DOM source, HA concentration range, ionic strength, and units (L/mg vs. L/mol)

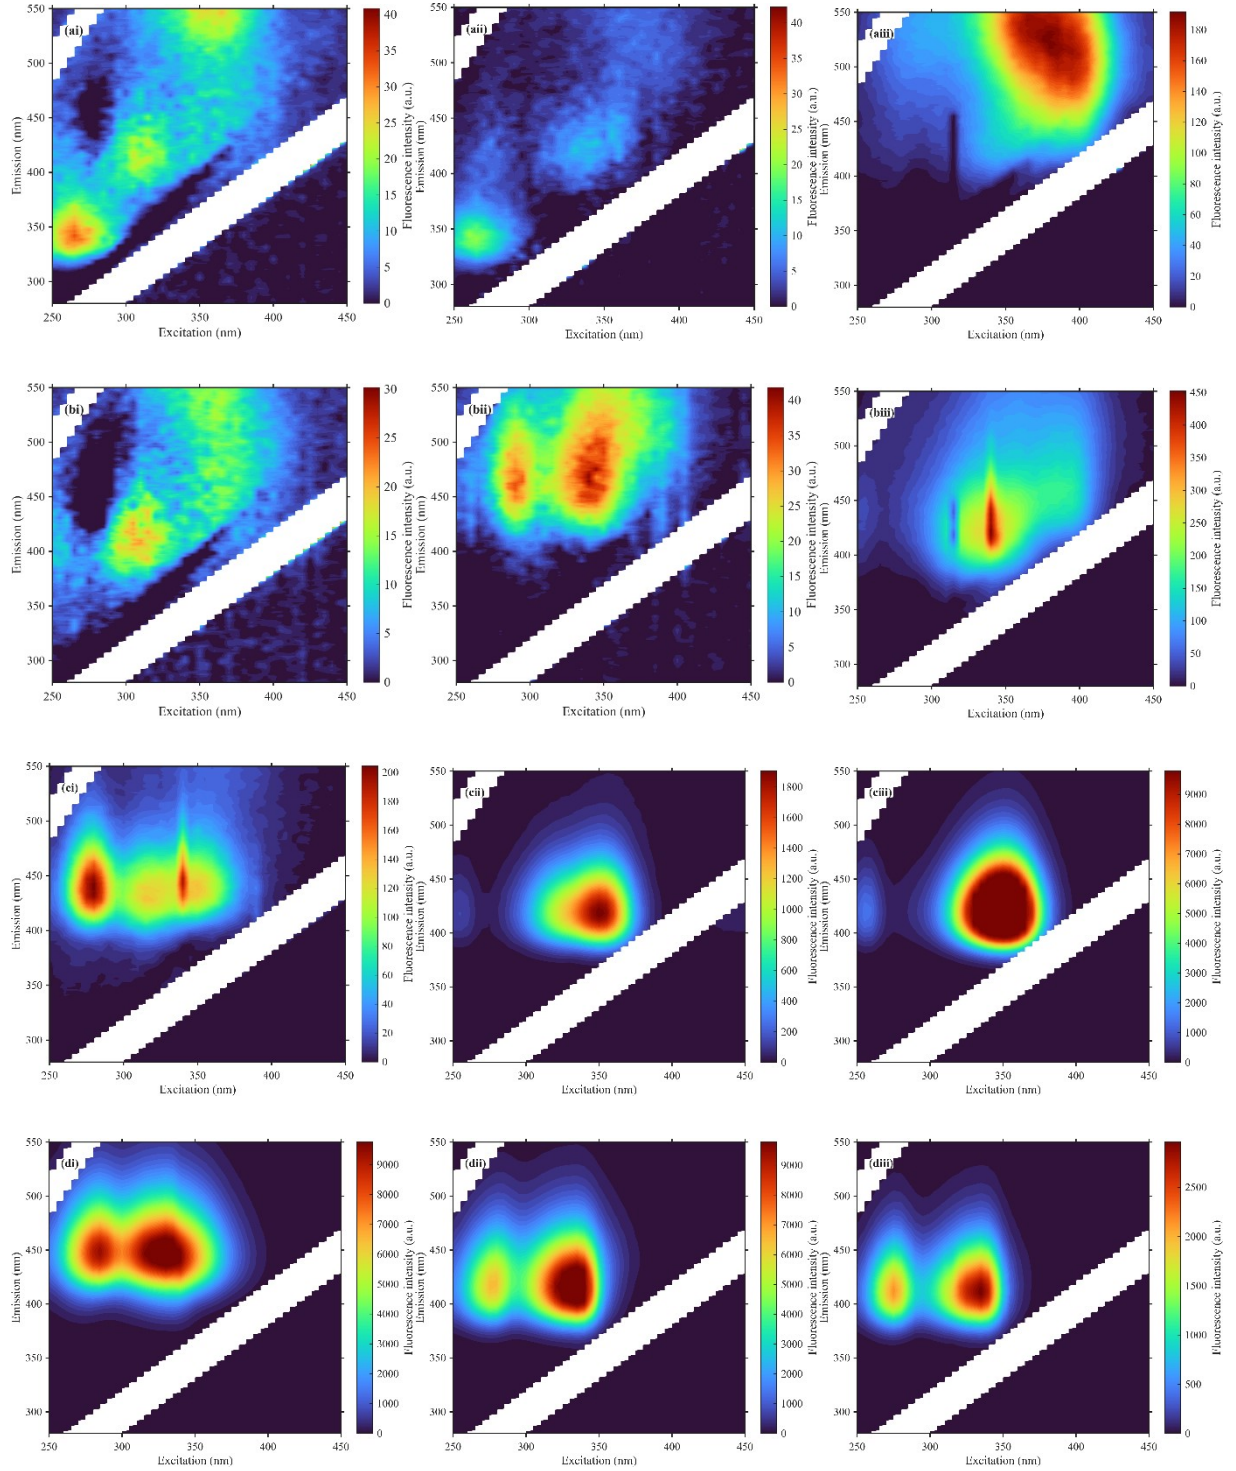

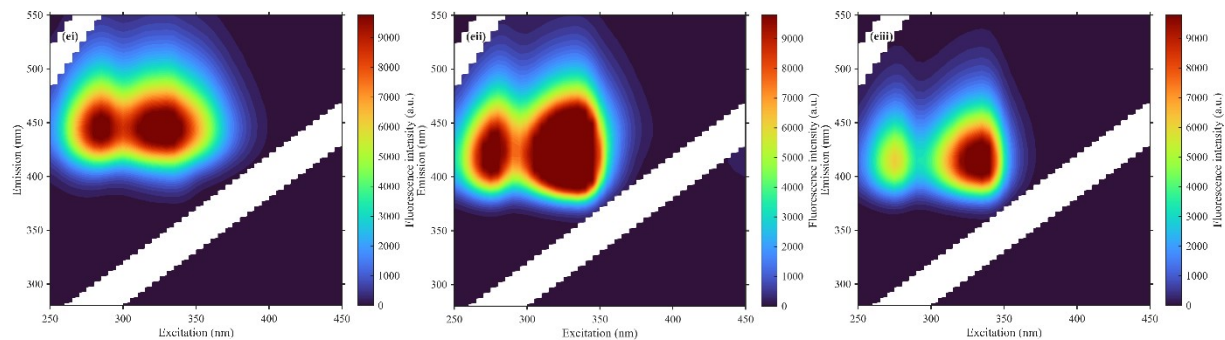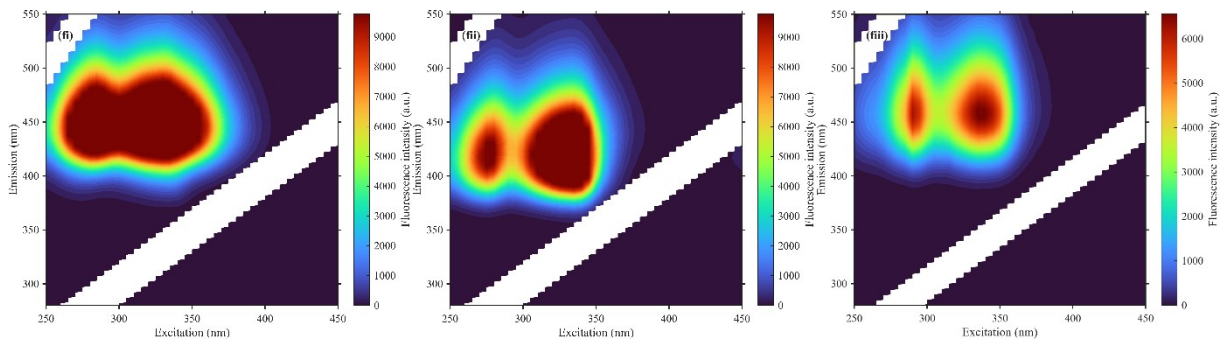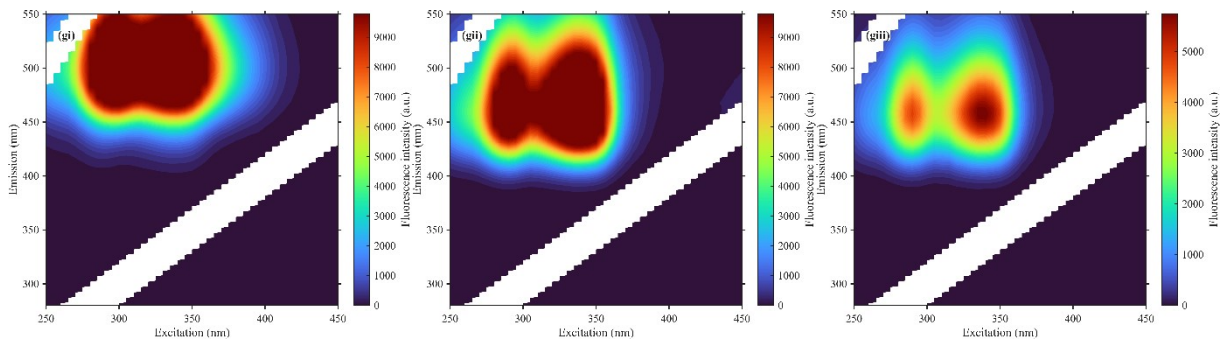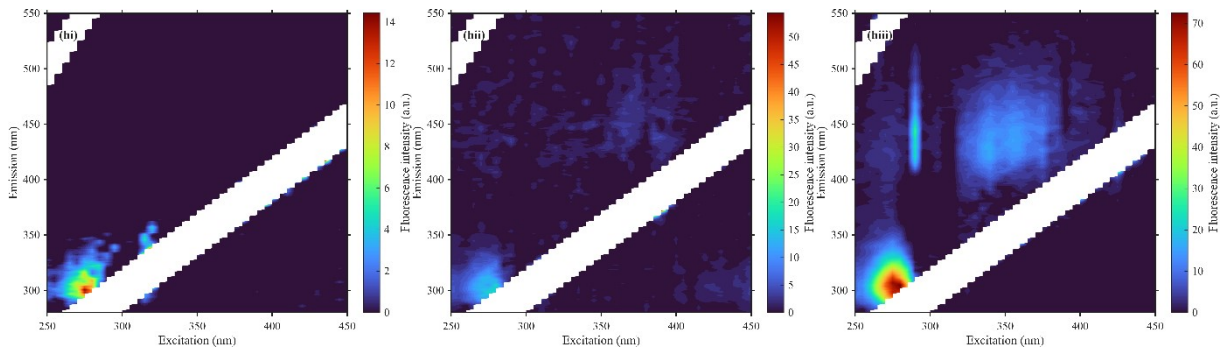

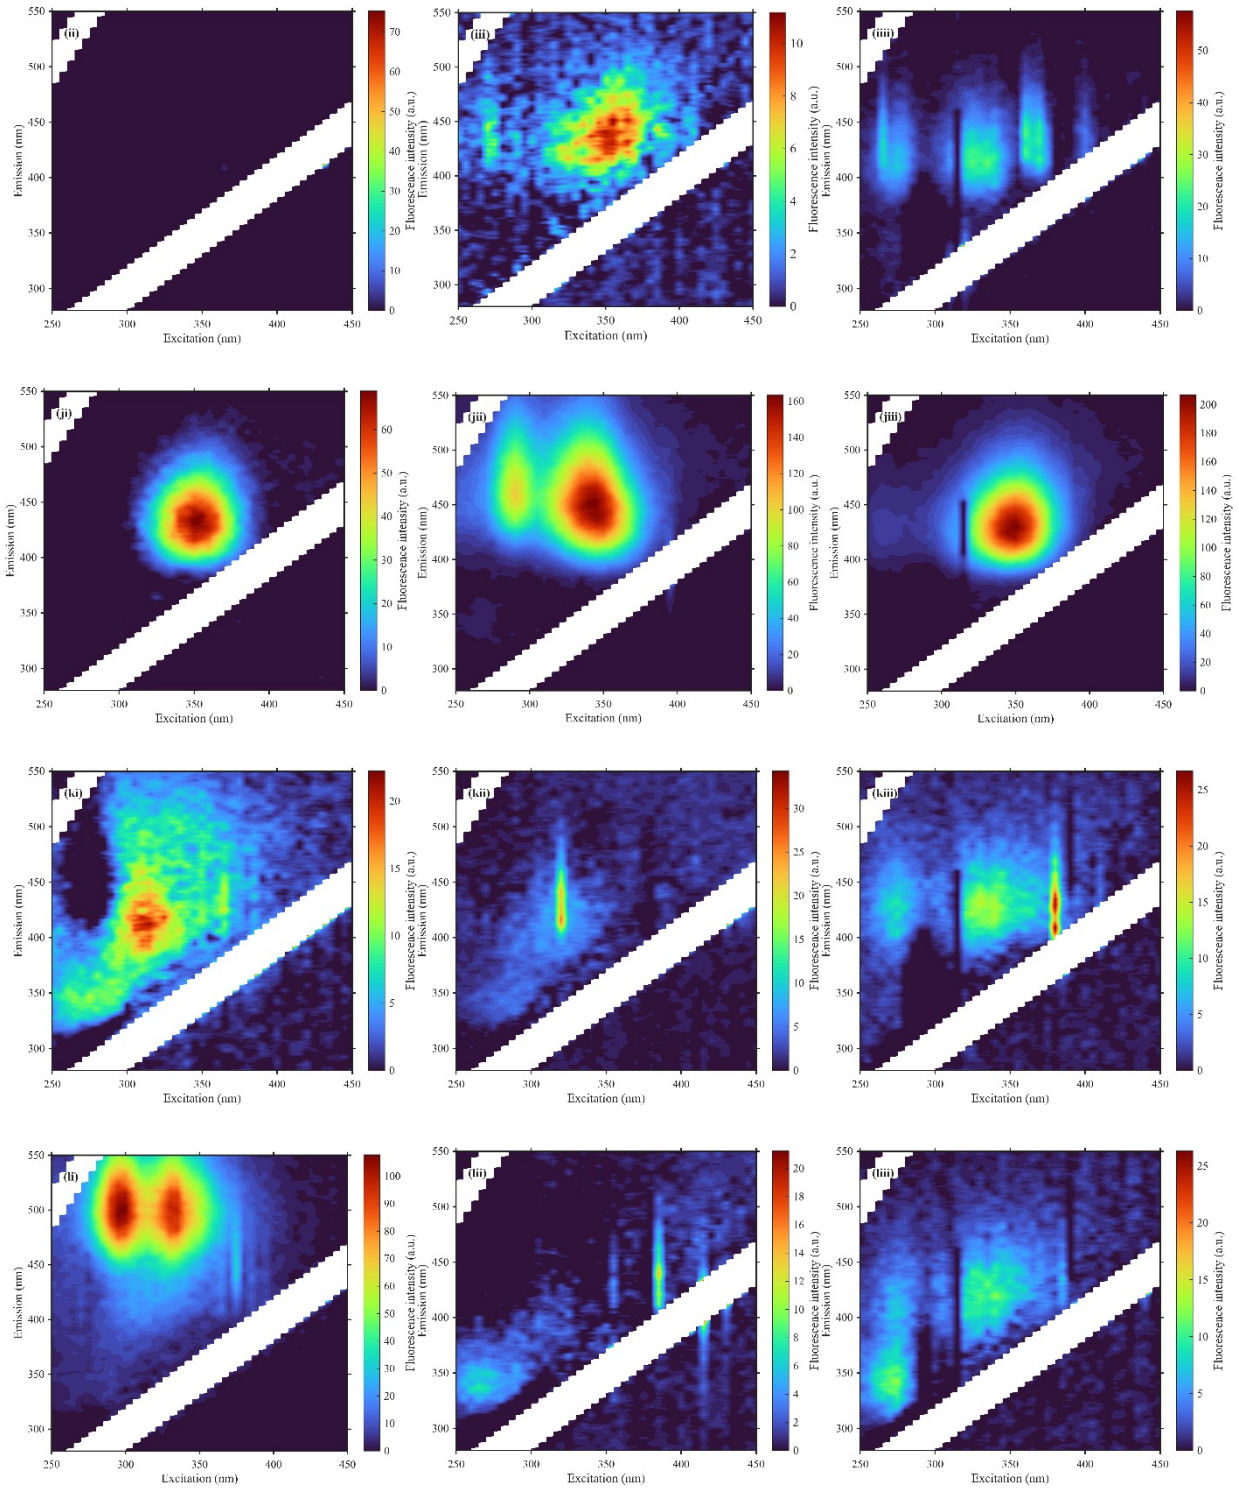

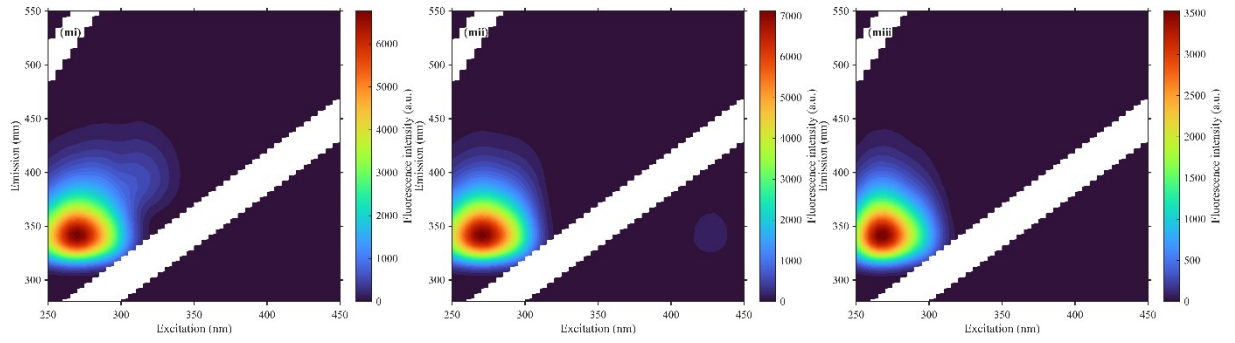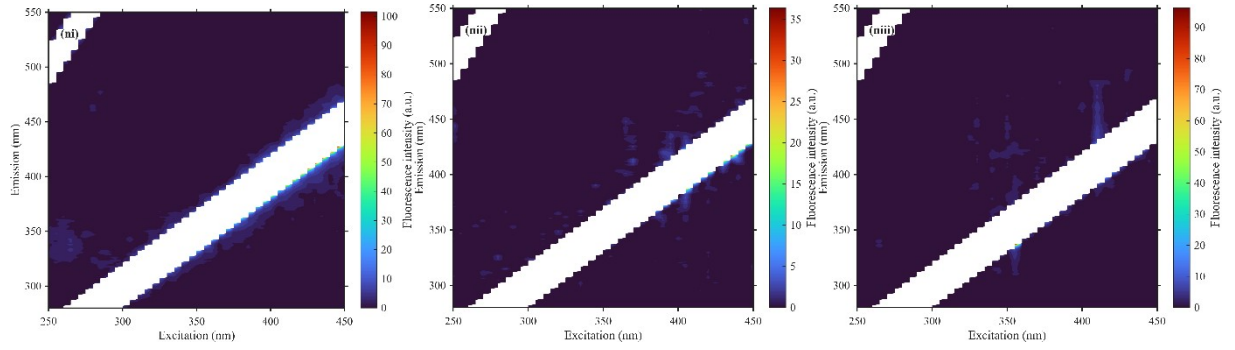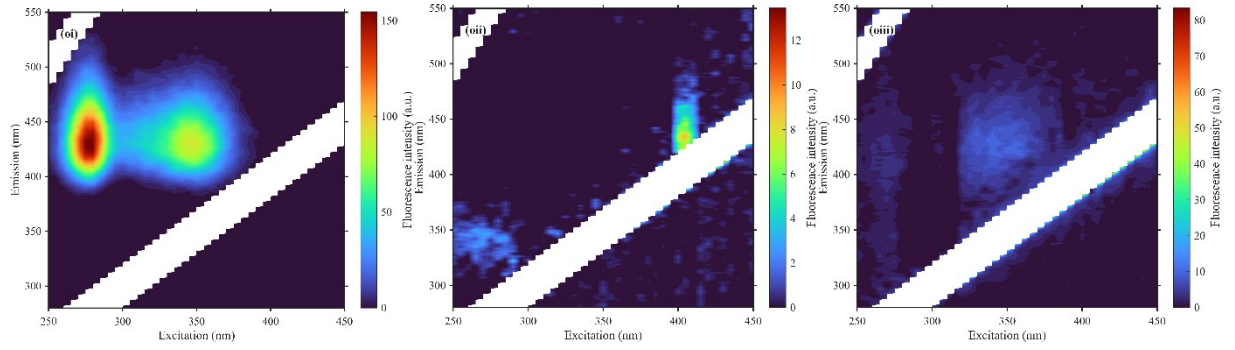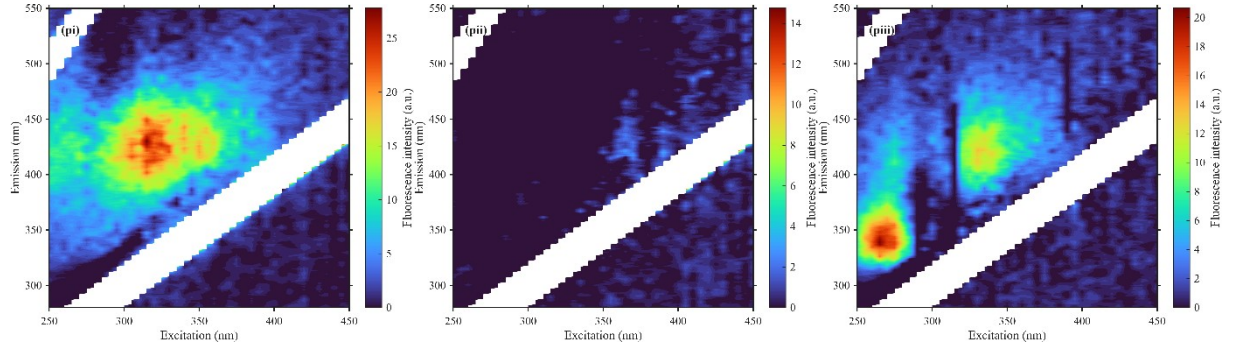

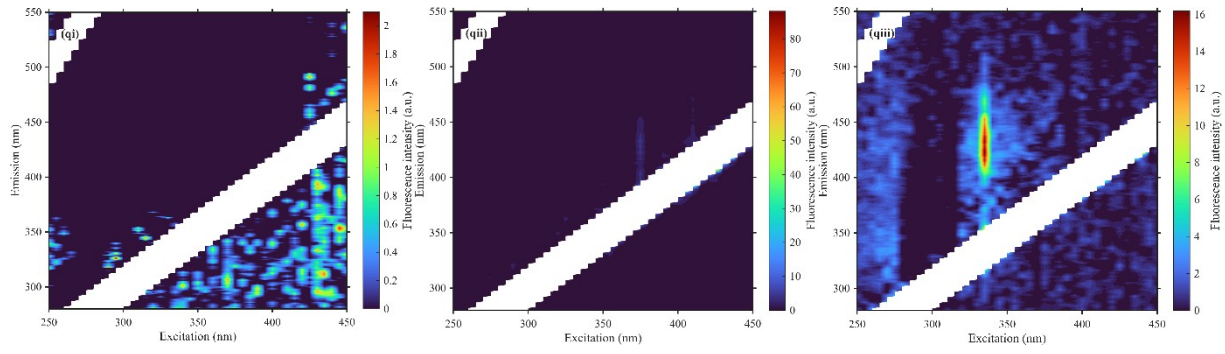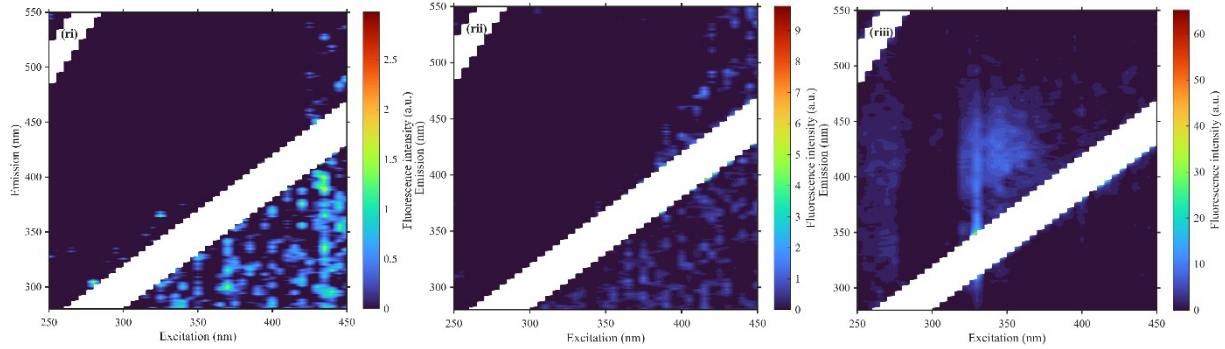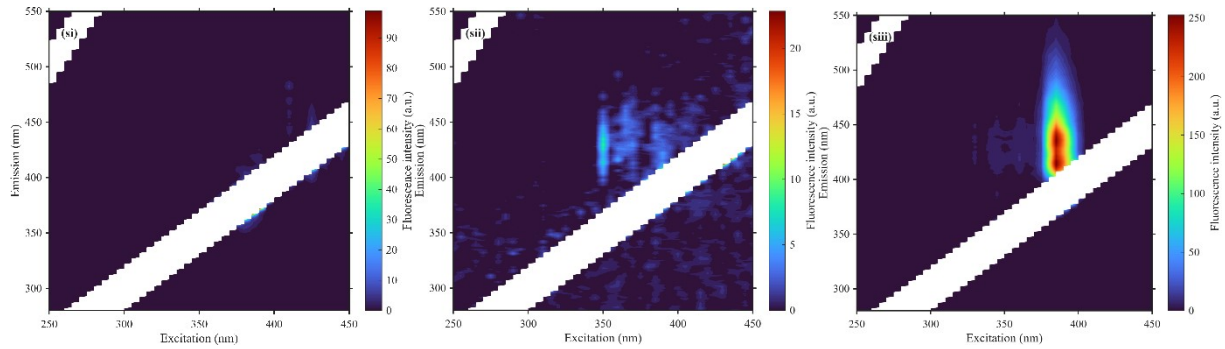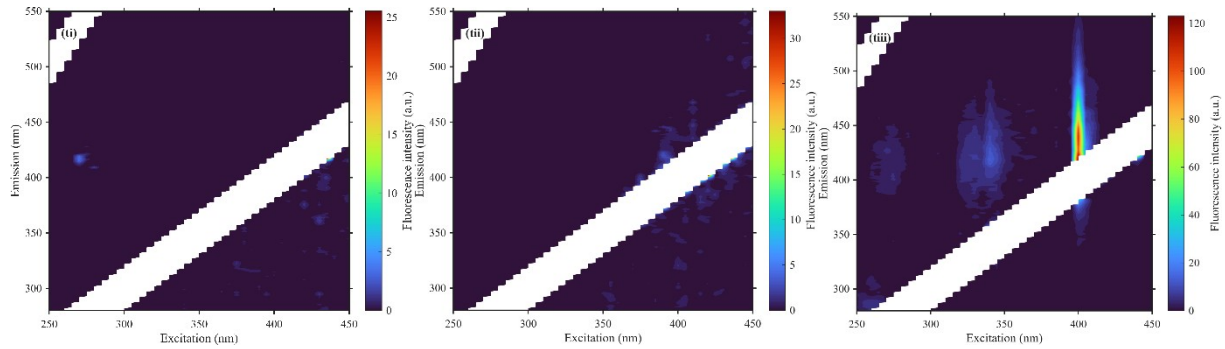

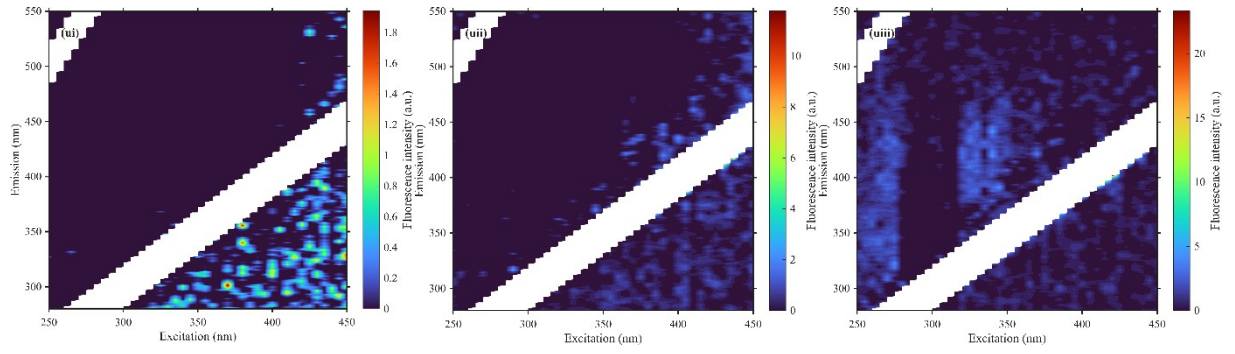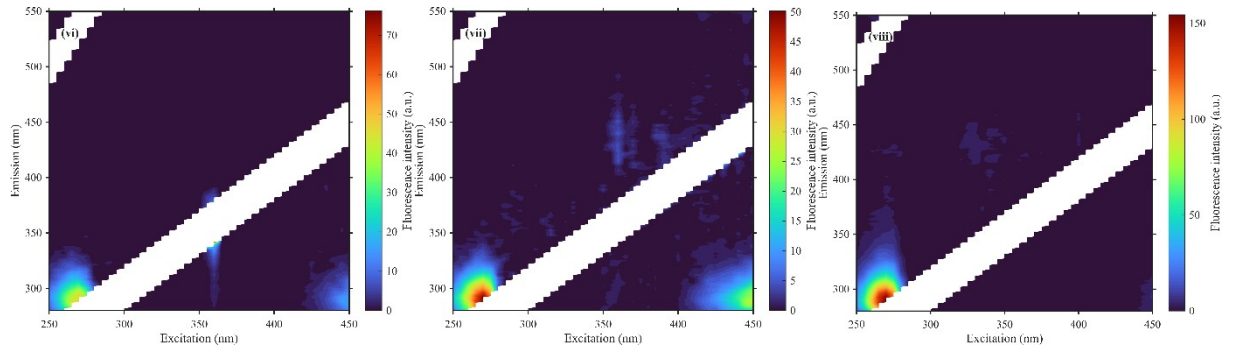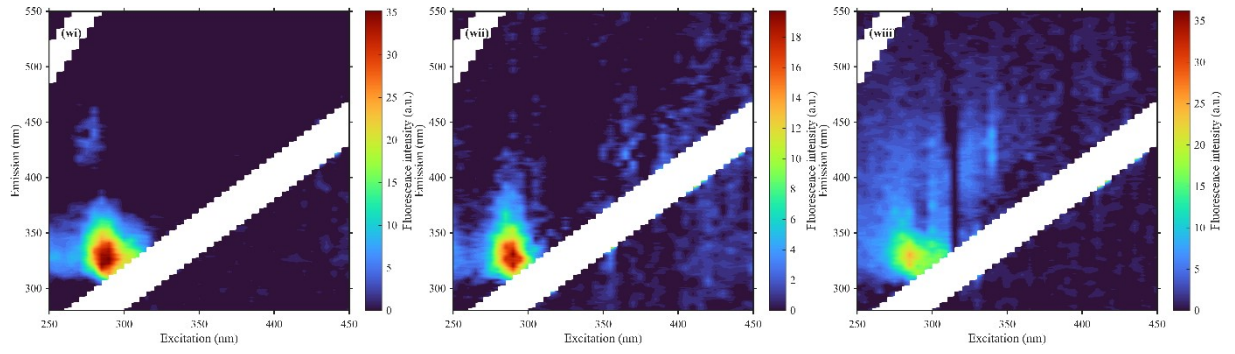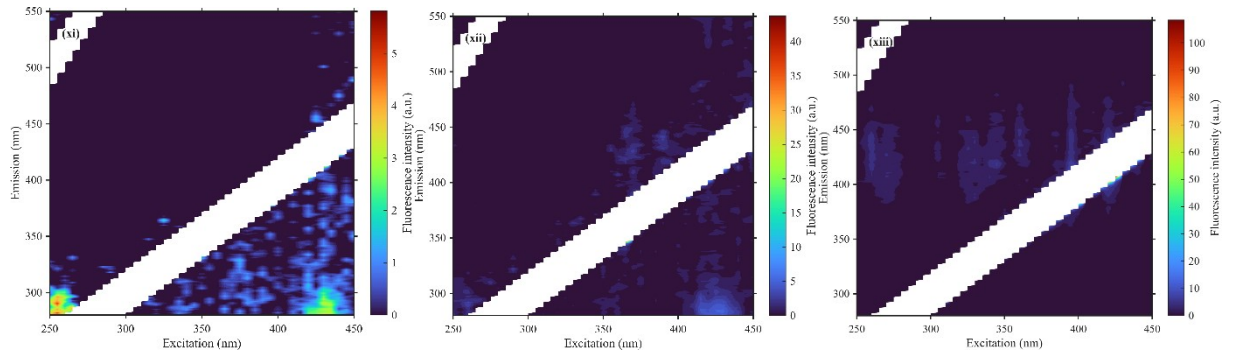

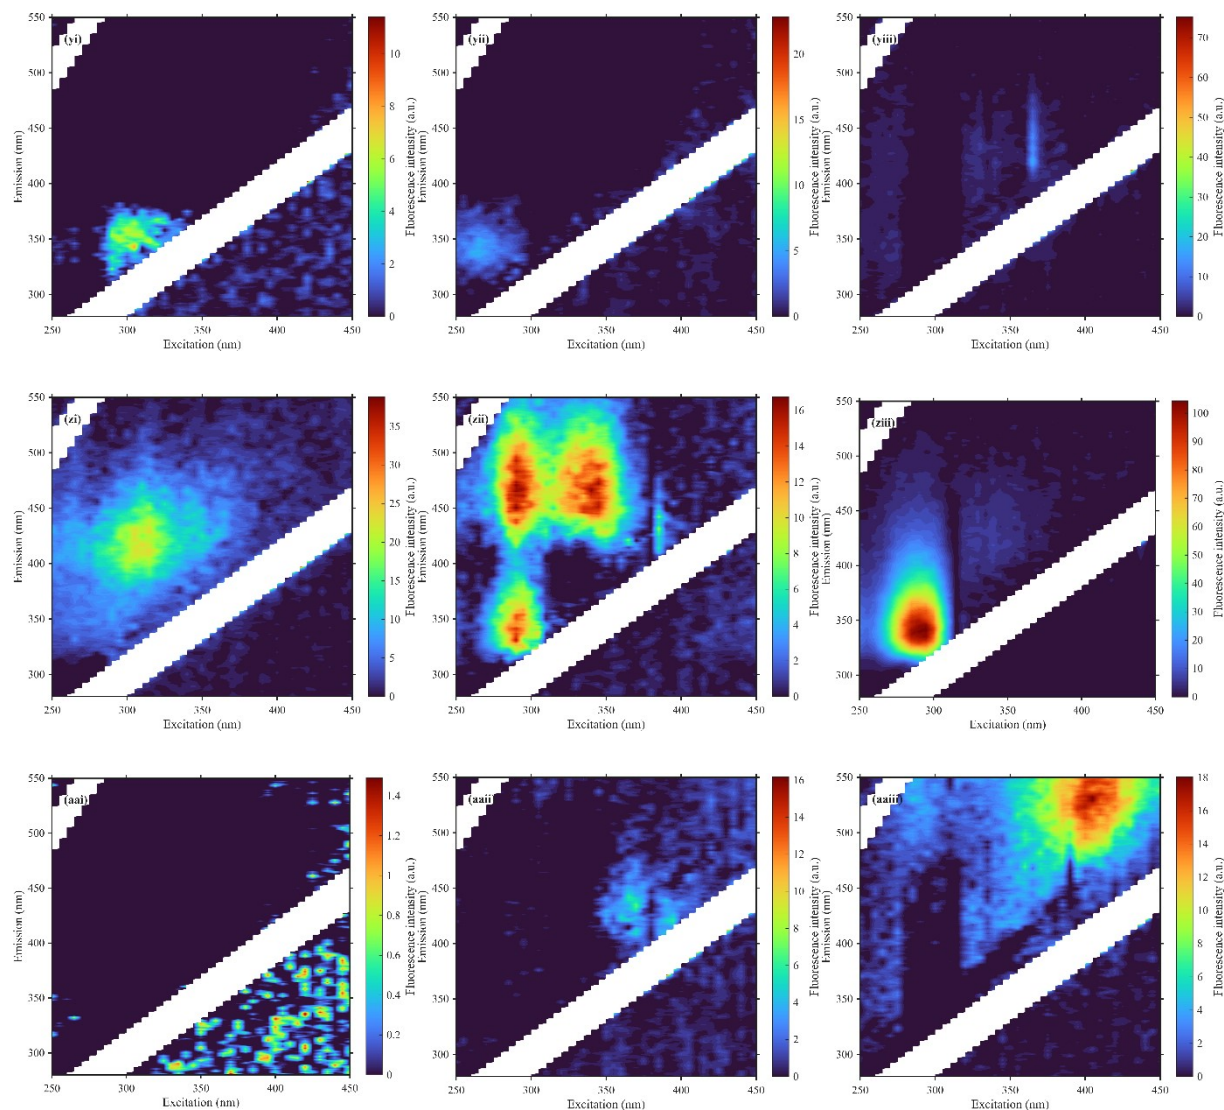

Figure S1. pH-dependent fluorescence overview of (ai) Tetracycline at pH 5 (aii) Tetracycline at pH 7 (aiii) Tetracycline at pH 9 (bi) Doxycycline at pH 5 (bii) Doxycycline at pH 7 (biii) Doxycycline at pH 9 (ci) Chlortetracycline at pH 5 (cii) Chlortetracycline at pH 7 (ciii) Chlortetracycline at pH 9 (di) Norfloxacin at pH 5 (dii) Norfloxacin at pH 7 (diii) Norfloxacin at pH 9 (ei) Ciprofloxacin at pH 5 (eii) Ciprofloxacin at pH 7 (eiii) Ciprofloxacin at pH 9 (fi) Enrofloxacin at pH 5 (fii) Enrofloxacin at pH 7 (fiii) Enrofloxacin at pH 9 (gi) Levofloxacin at pH 5 (gii) Levofloxacin at pH 7 (giii) Levofloxacin at pH 9 (hi) Amoxicillin at pH 5 (hii) Amoxicillin at pH 7 (hiii) Amoxicillin at pH 9 (ii) Ampicillin at pH 5 (iii) Ampicillin at pH 7 (iiii) Ampicillin at pH 9 (ji) Cephalexin at pH 5 (jii) Cephalexin at pH 7 (jiii) Cephalexin at pH 9 (ki) Sulfadimethoxine at pH 5 (kii) Sulfadimethoxine at pH 7 (kiii) Sulfadimethoxine at pH 9 (li) Sulfadiazine at pH 5 (lii) Sulfadiazine at pH 7 (liii) Sulfadiazine at pH 9 (mi) Sulfanilamide at pH 5 (mii) Sulfanilamide at pH 7 (miii) Sulfanilamide at pH 9 (ni) Erythromycin at pH 5 (nii) Erythromycin at pH 7 (niii) Erythromycin at pH 9 (oi) Azithromycin at pH 5 (oii) Azithromycin at pH 7 (oiii) Azithromycin at pH 9 (pi) Tylosin at pH 5 (pii) Tylosin at pH 7 (piii) Tylosin at pH 9 (qi) Gentamicin at pH 5 (qii) Gentamicin at pH 7 (qiii) Gentamicin at pH 9 (ri) Neomycin at pH 5 (rii) Neomycin at pH 7 (riii) Neomycin at pH 9 (si) Metronidazole at pH 5 (sii) Metronidazole at pH 7 (siii) Metronidazole at pH 9 (ti) Ornidazole at pH 5 (tii) Ornidazole at pH 7 (tiii) Ornidazole at pH 9 (ui) Chloramphenicol at pH 5 (uii) Chloramphenicol at pH 7 (uiii) Chloramphenicol at pH 9 (vi) Florfenicol at pH 5 (vii) Florfenicol at pH 7 (viii) Florfenicol at pH 9 (wi) Vancomycin at pH 5 (wii) Vancomycin at pH 7 (wiii) Vancomycin at pH 9 (xi) PolymyxinB at pH 5 (xii) PolymyxinB at pH 7 (xiii) PolymyxinB at pH 9 (yi) Clindamycin at pH 5 (yii)

Clindamycin at pH 7 (yiii) Clindamycin at pH 9 (zi) Trimethoprim at pH 5 (zii) Trimethoprim at pH 7 (ziii)  
 Trimethoprim at pH 9 (aai) Rifampicin at pH 5 (aaii) Rifampicin at pH 7 (aaiii) Rifampicin at pH 9

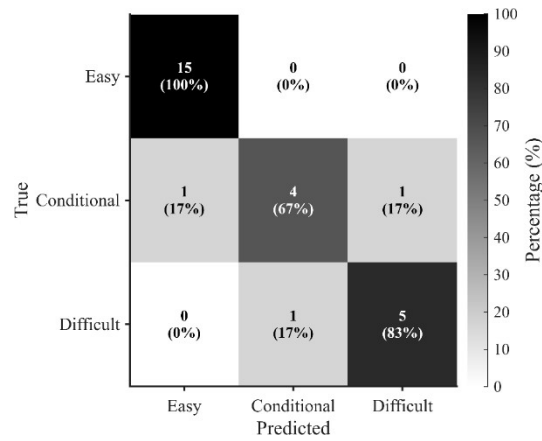

Figure S2. Confusion matrix for detection feasibility classification

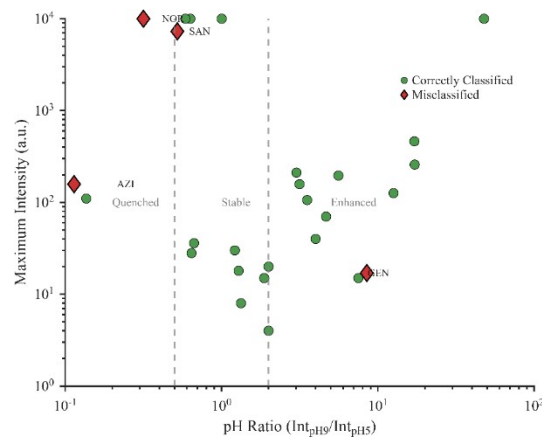

Figure S3. Misclassification analysis versus pH Ratio

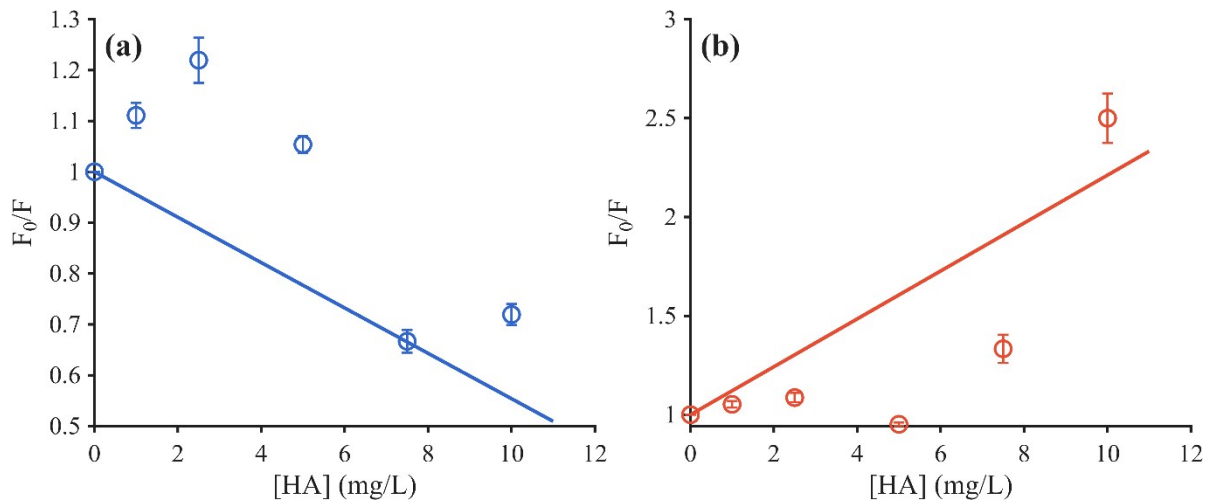

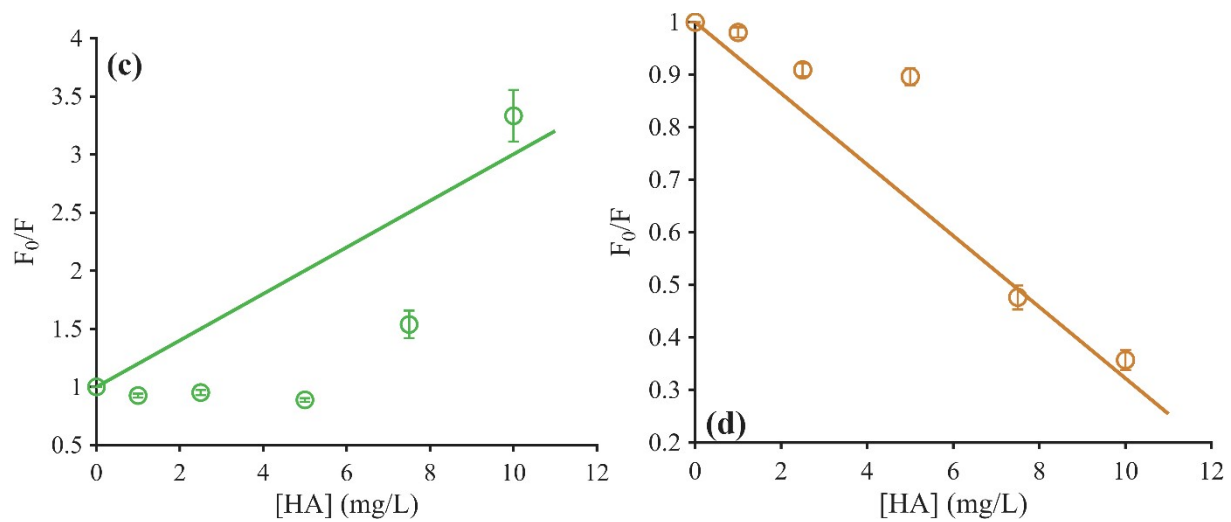

Figure S4. Stern-Volmer plot of Antibiotic-humic acid interactions (a) CIP; (b) CTC; (c) SAN; (d) CEP

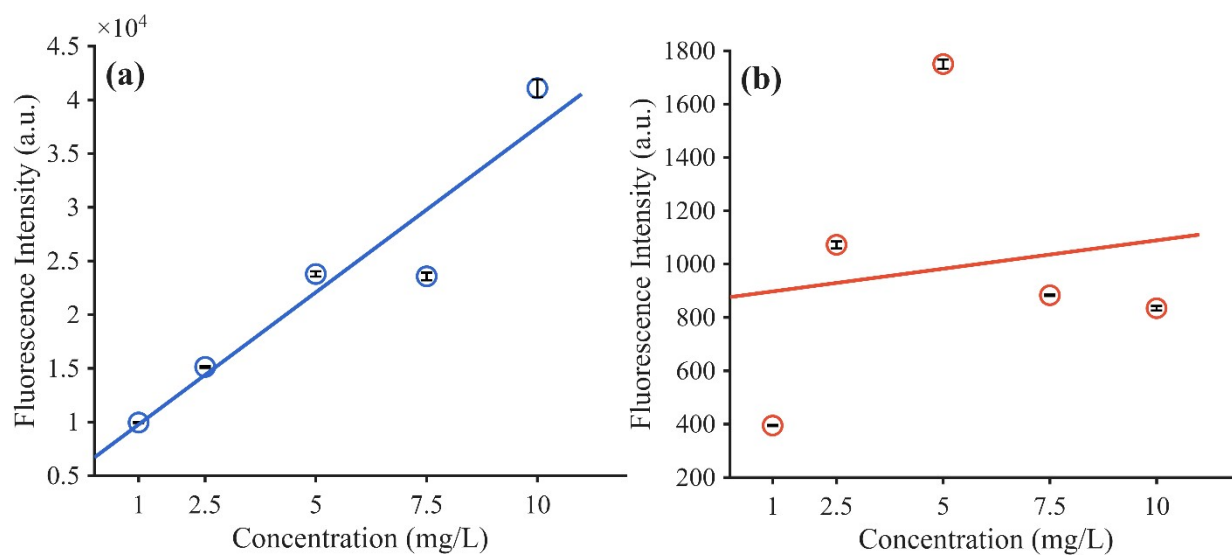

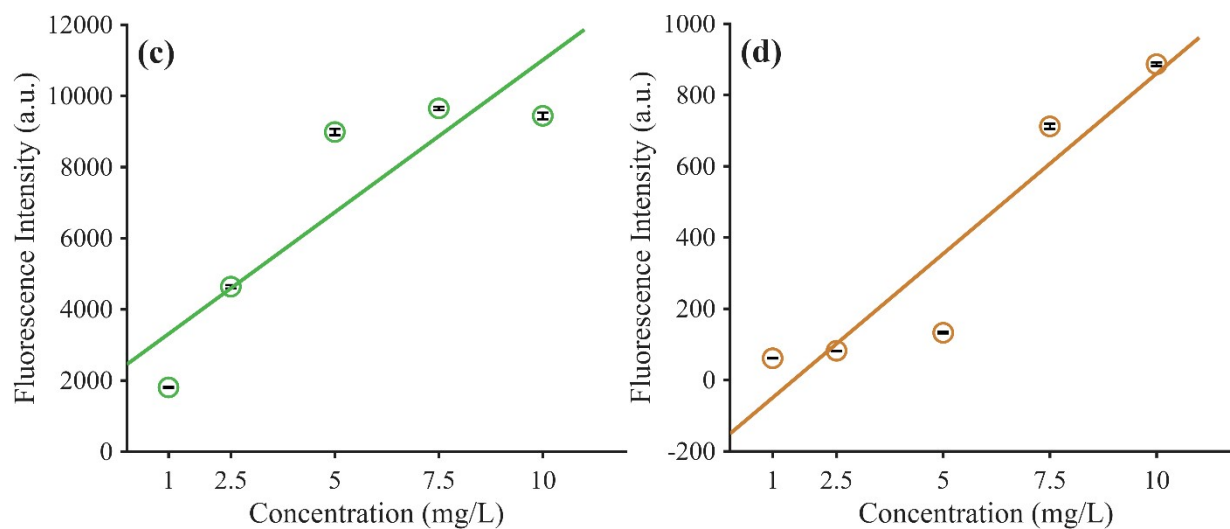

Figure S5. Calibration in wastewater of (a) CIP; (b) CTC; (c) SAN; (d) CEP

## References

- 1 I. T. Jolliffe and J. Cadima, *Philos. Trans. R. Soc. A*, 2016, **374**, 20150202.
- 2 B. H. Menze, B. M. Kelm, R. Masuch, U. Himmelreich, P. Bachert, W. Petrich and F. A. Hamprecht, *BMC Bioinformatics*, 2009, **10**, 213.
- 3 L. Breiman, *Random Forests*, 2001, vol. 45.
- 4 S. Arlot and A. Celisse, *Stat Surv*, 2010, **4**, 40–79. DOI: 10.1214/09-SS054
- 5 Y. Shu, F. Kong, Y. He, L. Chen, H. Liu, F. Zan, X. Lu, T. Wu, D. Si, J. Mao and X. Wu, *Water Res.*, 2024, **267**, 122618.
- 6 M. Sokolova and G. Lapalme, *Inf Process Manag*, 2009, **45**, 427–437. doi:10.1016/j.ipm.2009.03.002
- 7 R. P. Ferrie, G. E. Hewitt and B. D. Anderson, *Appl Spectrosc*, 2017, **71**, 2512–2518. <https://doi.org/10.1177/00037028177115655>
- 8 X. Zhao, Z. Hu, X. Yang, X. Cai, Z. Wang and X. Xie, *Environmental Pollution*, 2019, **248**, 815–822. <https://doi.org/10.1016/j.envpol.2019.02.077>
- 9 R. Yang, Y. Fu, L. di Li and J. M. Liu, *Spectrochim Acta A Mol Biomol Spectrosc*, 2003, **59**, 2723–2732.

10 R. Wang, S. Yang, J. Fang, Z. Wang, Y. Chen, D. Zhang and C. Yang, *Int. J. Environ. Res. Public Health*, 2018, **15**, 1458.

11 P. F. Yan, Z. H. Hu, H. Q. Yu, W. H. Li and L. Liu, *Environ. Sci. Pollut. Res.*, 2016, **23**, 5667–5675, DOI: 10.1007/s11356-015-5800-0.

12 M. P. Schmidt, D. J. Ashworth and A. M. Ibekwe, *Environ Sci (Camb)*, 2024, **10**, 949-959. <https://doi.org/10.1039/D3EW00590A>
